# Supplementary material for: Partially oxidized inter-doped RuNi alloy aerogel for the hydrogen evolution reaction in both alkaline and acidic media
Source: Royal Society of Chemistry journal article supplement (doi:10.1039/d4mh00242c), 2024-01-01
Supplement: d4mh00242c1.pdf [file d4mh00242c1.pdf]

Electronic supplementary information (ESI) for

**Partially oxidized inter-doped RuNi alloy aerogel for the  
hydrogen evolution reaction in both alkaline and acidic media**

Taehee Kim, Hwapyung Jung, Haryeong Choi, Wonjun Lee, Umakant M. Patil, Vinayak G. Parale, Younghun Kim, Jiseung Kim, Sang-Hyun Kim, and Hyung-Ho Park\*

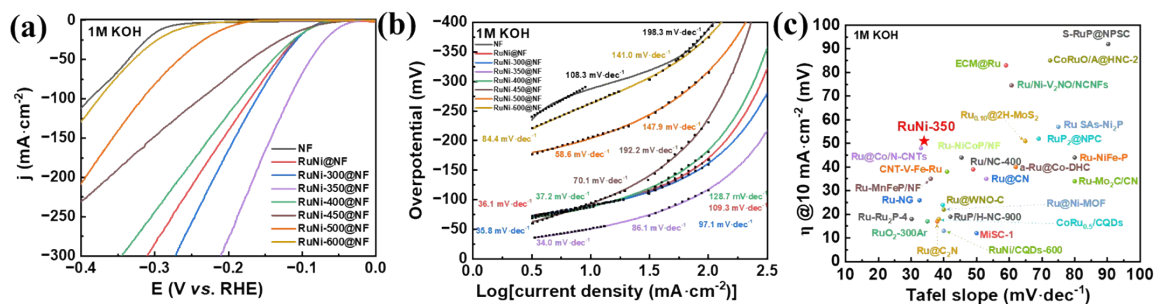

**Figure S1.** Comparison of the electrochemical HER activities of RuNi@NF with different oxidation temperature by (a) LSV curves and corresponding Tafel slopes (b) in alkaline electrolyte. (c) Comparison of HER performance in alkaline media ( $\eta$  at  $10 \text{ mA cm}^{-2}$  and Tafel slope) for variously reported electrocatalysts. RuNi-350@NF is presented by a red star.



**Table S1.** The calculated Tafel slopes at low and higher overpotentials for each samples

| Samples                 | Acidic electrolyte                                     |                                                        | Alkaline electrolyte                                   |                                                        |
|-------------------------|--------------------------------------------------------|--------------------------------------------------------|--------------------------------------------------------|--------------------------------------------------------|
|                         | 1 <sup>st</sup> Tafel slope<br>(mV·dec <sup>-1</sup> ) | 2 <sup>nd</sup> Tafel slope<br>(mV·dec <sup>-1</sup> ) | 1 <sup>st</sup> Tafel slope<br>(mV·dec <sup>-1</sup> ) | 2 <sup>nd</sup> Tafel slope<br>(mV·dec <sup>-1</sup> ) |
| <b>NF</b>               | 187.6                                                  | 249.4                                                  | 108.3                                                  | 198.3                                                  |
| <b>RuNi@NF</b>          | 44.4                                                   | 123.2                                                  | 36.1                                                   | 109.3                                                  |
| <b>RuNi-<br/>300@NF</b> | 35.6                                                   | 104.1                                                  | 35.8                                                   | 97.1                                                   |
| <b>RuNi-<br/>350@NF</b> | 30.9                                                   | 96.1                                                   | 34.0                                                   | 86.1                                                   |
| <b>RuNi-<br/>400@NF</b> | 44.5                                                   | 138.8                                                  | 37.2                                                   | 128.7                                                  |
| <b>RuNi-<br/>450@NF</b> | 57.1                                                   | 184.7                                                  | 70.1                                                   | 192.2                                                  |
| <b>RuNi-<br/>500@NF</b> | 70.0                                                   | 189.2                                                  | 58.6                                                   | 147.9                                                  |
| <b>RuNi-<br/>600@NF</b> | 80.0                                                   | 258.5                                                  | 84.4                                                   | 141.0                                                  |

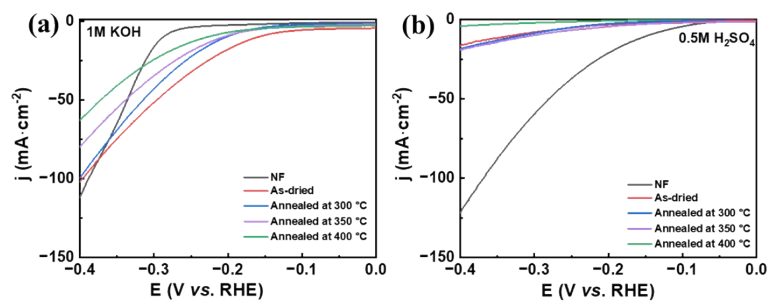

**Figure S3.** Comparison of the electrochemical HER activities of bare NF with supercritically dried and heat treated NF in (a) alkaline and (b) acidic media.

**Table S2.** Fitted electrical circuits and parameters of Nyquist plots of electrocatalysts (in KOH electrolyte)

| Parameters       | RuNi@NF                                                                           | RuNi-300@NF                                                                       | RuNi-350@NF                                                                        | RuNi-400@NF                                                                         |
|------------------|-----------------------------------------------------------------------------------|-----------------------------------------------------------------------------------|------------------------------------------------------------------------------------|-------------------------------------------------------------------------------------|
| $R_s$            | 0.1509                                                                            | 0.15011                                                                           | 0.15093                                                                            | 0.159                                                                               |
| $R_1$            | 0.1901                                                                            | 0.16762                                                                           | 0.14375                                                                            | 0.0348                                                                              |
| $R_2$            | -                                                                                 | -                                                                                 | -                                                                                  | 0.20024                                                                             |
| $W_{1-R}$        | 0.18314                                                                           | -                                                                                 | -                                                                                  | 0.00015094                                                                          |
| $W_{1-T}$        | 2.294                                                                             | -                                                                                 | -                                                                                  | 1.5234                                                                              |
| $W_{1-P}$        | 0.021318                                                                          | -                                                                                 | -                                                                                  | 0.065604                                                                            |
| $CPE_{1-T}$      | 0.027619                                                                          | 0.12802                                                                           | 0.1026                                                                             | 0.52684                                                                             |
| $CPE_{1-P}$      | 0.62893                                                                           | 0.65982                                                                           | 0.67472                                                                            | 0.46534                                                                             |
| $CPE_{2-T}$      | -                                                                                 | -                                                                                 | -                                                                                  | 0.020829                                                                            |
| $CPE_{2-P}$      | -                                                                                 | -                                                                                 | -                                                                                  | 1.239                                                                               |
| Chi-square value | 0.00066                                                                           | 0.0010                                                                            | 0.0010                                                                             | 0.00051                                                                             |
| Fitted Circuit   | 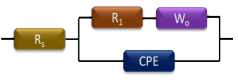 |  |  |  |

**Table S3.** Fitted electrical circuits and parameters of Nyquist plots of electrocatalysts (in H<sub>2</sub>SO<sub>4</sub> electrolyte)

| Parameters               | Ru@NF                                                                             | Ru-300@NF                                                                         | Ru-350@NF                                                                          | Ru-400@NF                                                                           |
|--------------------------|-----------------------------------------------------------------------------------|-----------------------------------------------------------------------------------|------------------------------------------------------------------------------------|-------------------------------------------------------------------------------------|
| <b>R<sub>s</sub></b>     | 0.087104                                                                          | 0.094953                                                                          | 0.098034                                                                           | 0.086038                                                                            |
| <b>R<sub>1</sub></b>     | 0.21153                                                                           | 0.13477                                                                           | 0.08839                                                                            | 0.2484                                                                              |
| <b>CPE<sub>1-T</sub></b> | 0.041511                                                                          | 0.14794                                                                           | 0.055506                                                                           | 0.10597                                                                             |
| <b>CPE<sub>1-P</sub></b> | 0.5344                                                                            | 0.51928                                                                           | 0.63981                                                                            | 0.46486                                                                             |
| <b>Chi-square value</b>  | 4.23 x 10 <sup>-11</sup>                                                          | 2.11 x 10 <sup>-5</sup>                                                           | 3.12 x 10 <sup>-5</sup>                                                            | 1.0 x 10 <sup>-5</sup>                                                              |
| <b>Fitted Circuit</b>    | 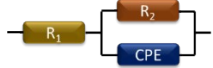 |  |  |  |

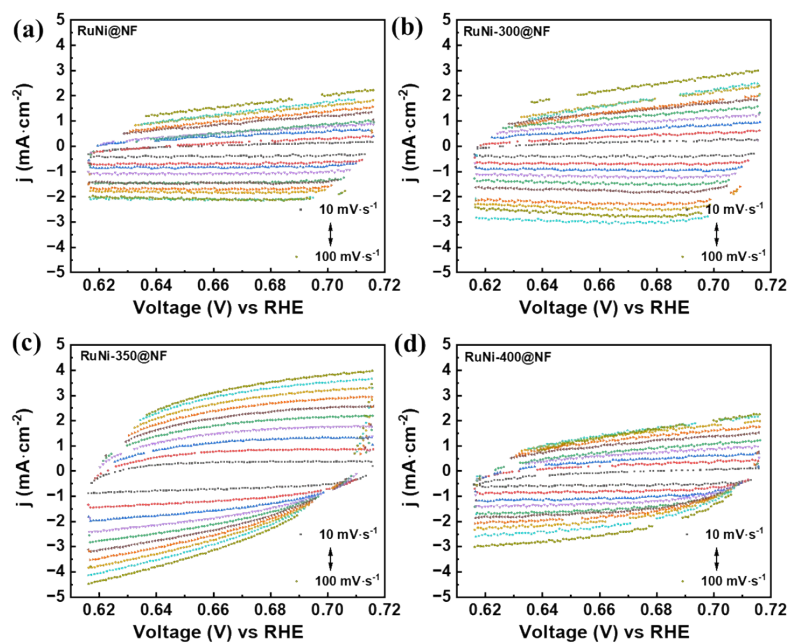

**Figure S4.** Cyclic voltammogram (CV) measured at non-Faradic region at various scan rates of (a) RuNi@NF, (b) RuNi-300@NF, (c) RuNi-350@NF, and (d) RuNi-400@NF.



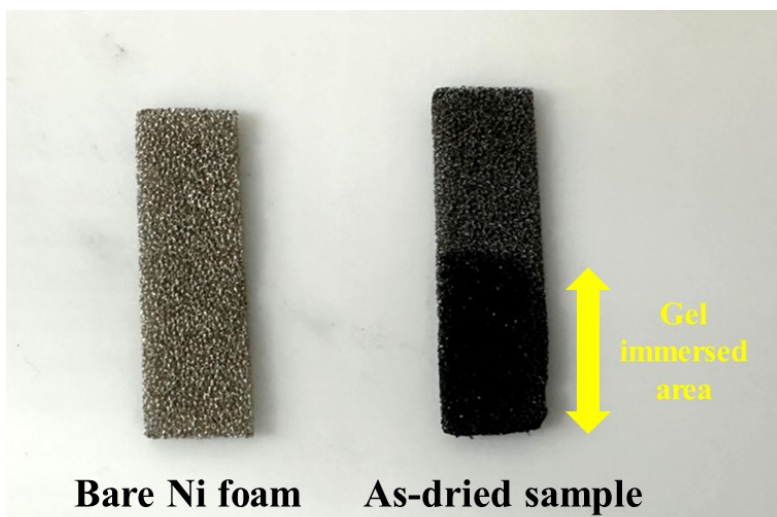

**Figure S5.** Optical images of bare nickel foam and after supercritical ethanol drying. The yellow arrow indicates areas where the gel has been applied and immersed.

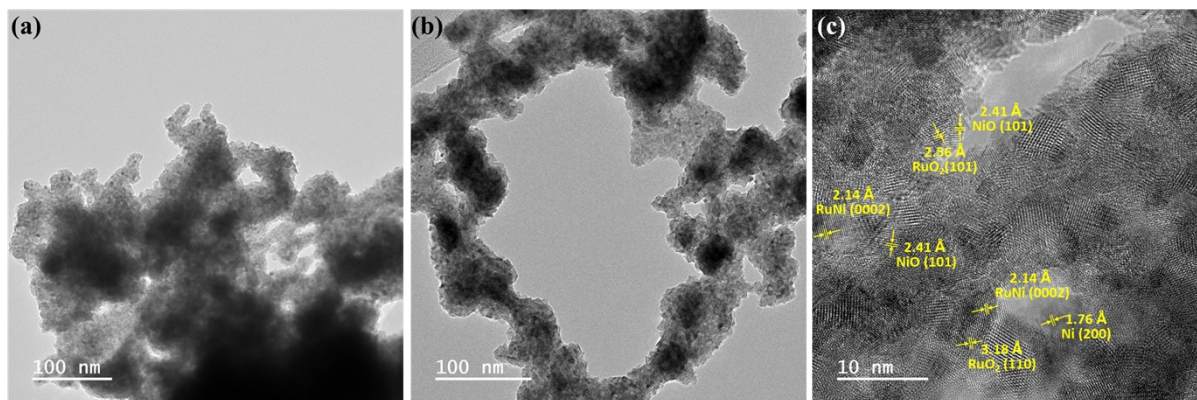

**Figure S6.** (a, b) TEM images and (c) a HRTEM image of the RuNi-350@NF indicating multiple phases.

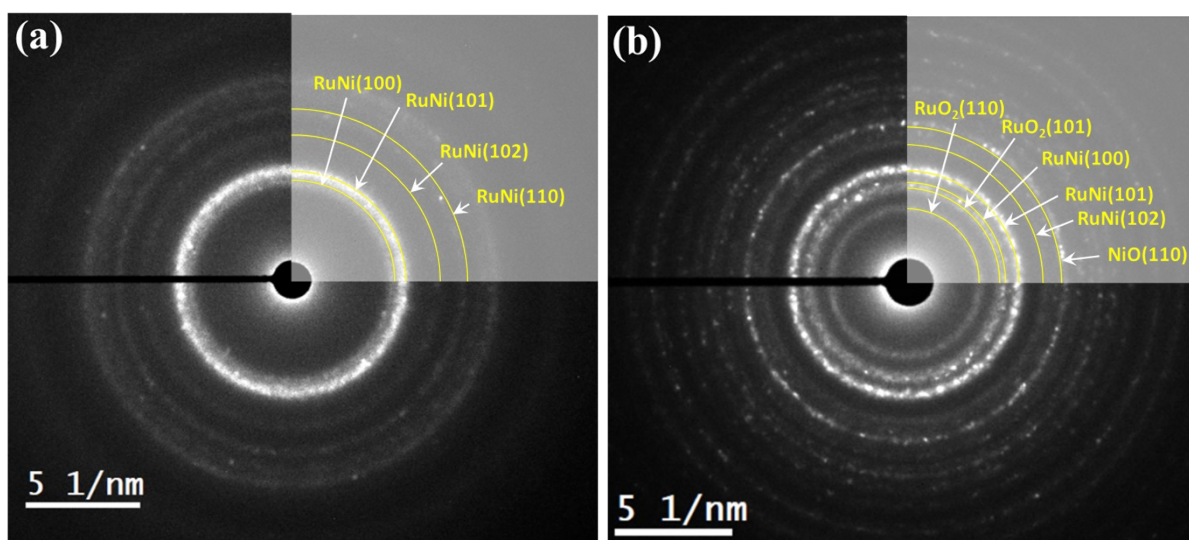

**Figure S7.** (a) SAED patterns of RuNi@NF and RuNi-350@NF samples representing the existence of multiple phases.

**Table S4.** Chemical composition of each aerogel sample determined using EDX and STEM imaging

| <b>Element</b> | <b>RuNi<br/>(at%)</b> | <b>RuNi-300<br/>(at%)</b> | <b>RuNi-350<br/>(at%)</b> | <b>RuNi-400<br/>(at%)</b> |
|----------------|-----------------------|---------------------------|---------------------------|---------------------------|
| <b>O</b>       | 2.22                  | 34.30                     | 52.91                     | 58.18                     |
| <b>Ni</b>      | 34.57                 | 23.65                     | 15.84                     | 19.14                     |
| <b>Ru</b>      | 63.21                 | 42.05                     | 31.25                     | 22.68                     |
| <b>Total</b>   | 100.00                | 100.00                    | 100.00                    | 100.00                    |

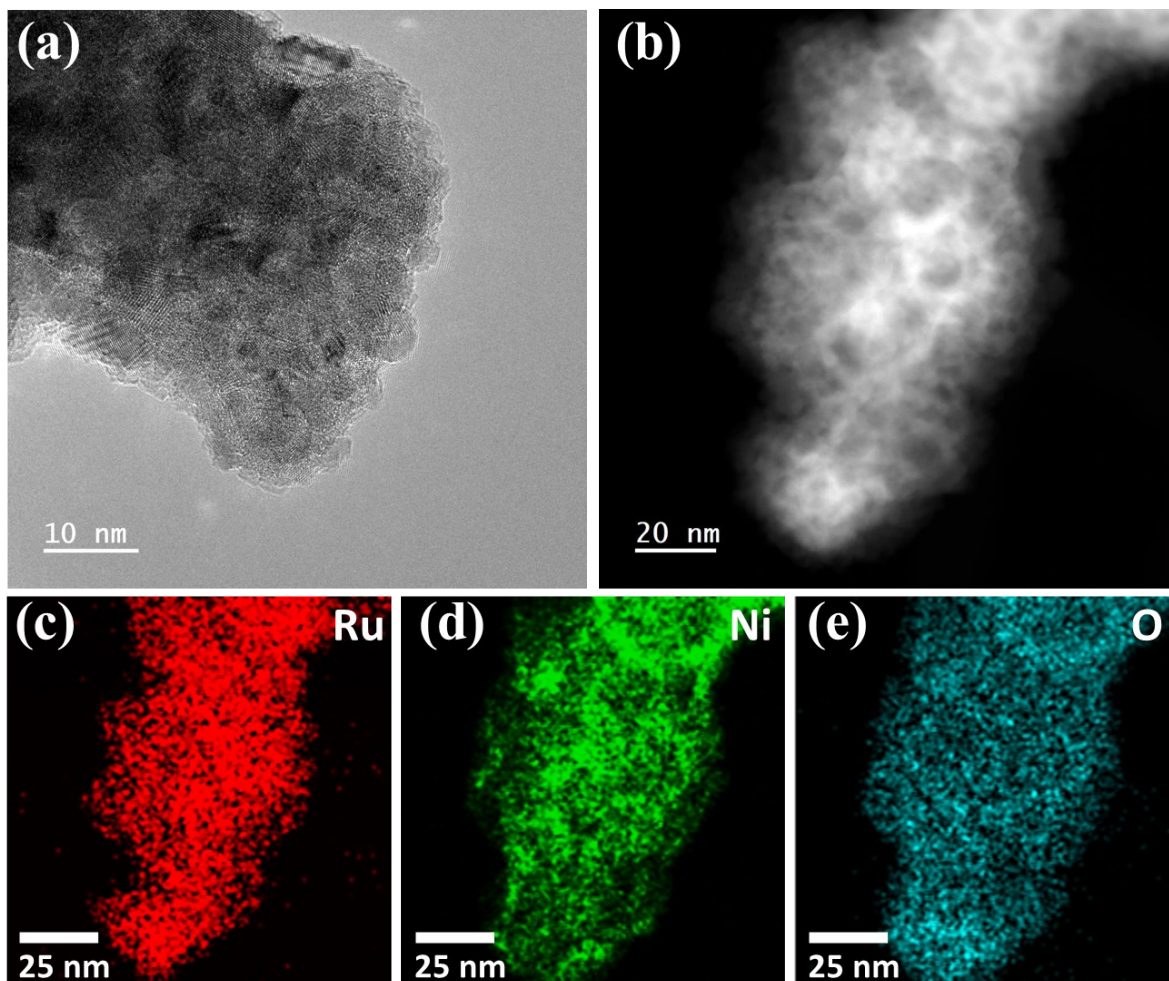

**Figure S8.** (a) HRTEM images of RuNi-300 aerogel, (b) HAADF-STEM image of RuNi-300 aerogel. EDX elemental mapping images of (c) Ru, (d) Ni, and (e) O in RuNi-300 aerogel catalyst.

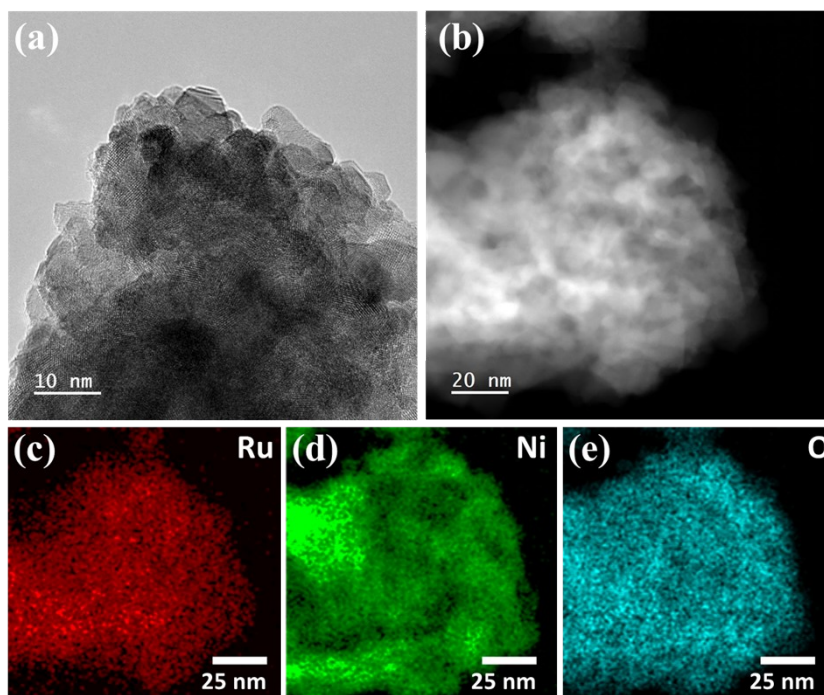

**Figure S9.** (a) HRTEM images of RuNi-400 aerogel, (b) HAADF-STEM image of RuNi-400 aerogel. EDX elemental mapping images of (c) Ru, (d) Ni, and (e) O in RuNi-400 aerogel catalyst.

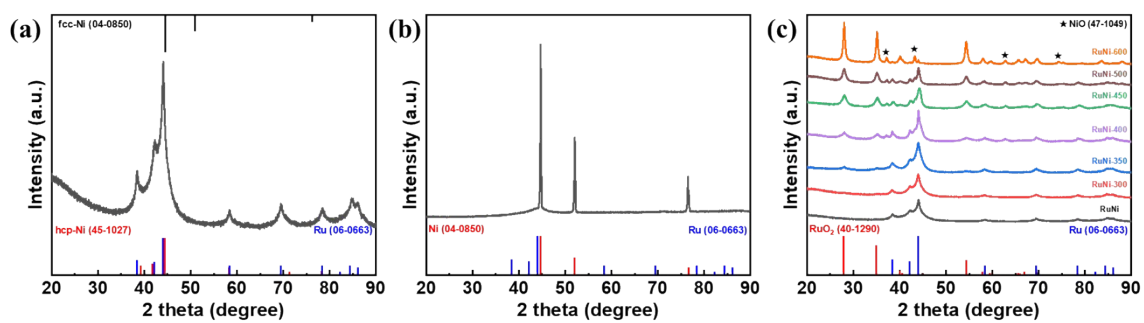

**Figure S10.** XRD patterns of (a) RuNi sample showing hcp-Ru and hcp-Ni phases, (b) RuNi@NF samples showing a strong peaks from NF and (c) aerogel samples with different oxidation temperatures from 300 to 600 °C.

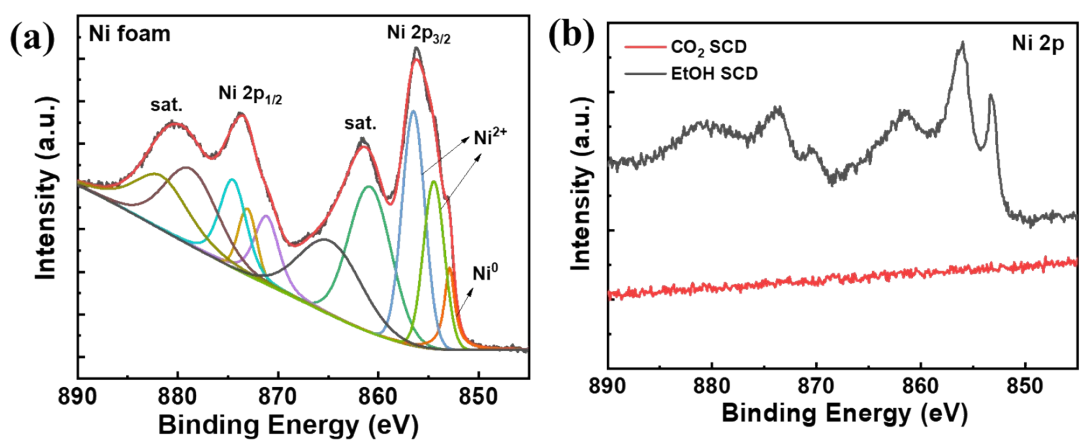

**Figure S11.** XPS Ni 2p spectra of (a) acid treated NF and (b) CO<sub>2</sub> supercritical dried (60 °C, 130 bar) and EtOH supercritical dried of as-synthesized samples.



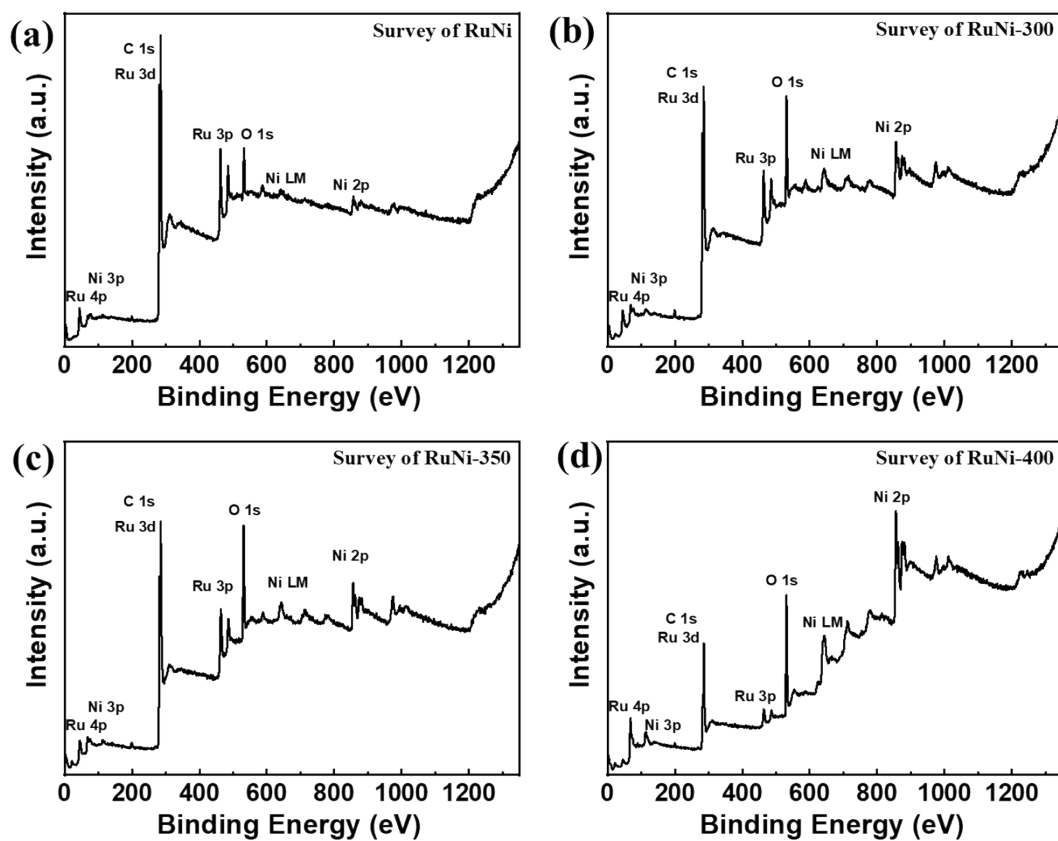

**Figure S12.** XPS survey scan of (a) RuNi, (b) RuNi-300, (c) RuNi-350, and (d) RuNi-400 aerogels.

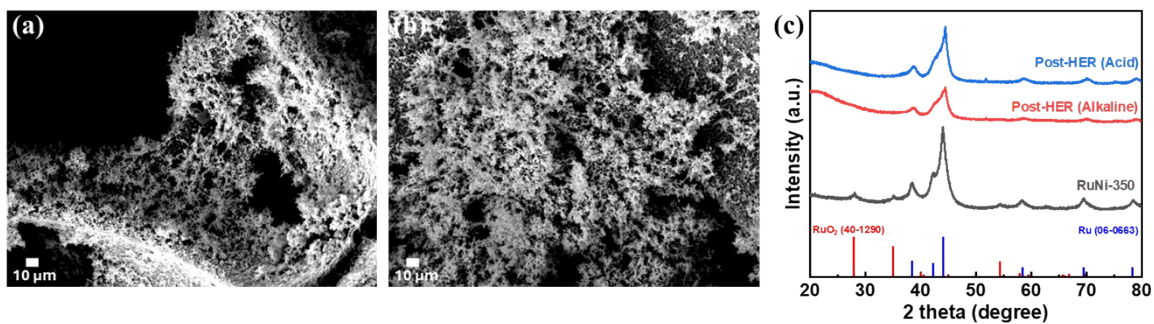

**Fig. S13.** SEM images of the RuNi-350@NF electrocatalysts after long-term (35 h) stability test (a) alkaline and (b) acidic electrolyte. The comparison analyses of (c) XRD patterns for before and after the long-term stability tests.

**Table S5.** Electrolyte analyses using inductively coupled plasma-mass spectrometry (ICP-MS) after the stability test

| <b>Element</b>                              | <b>Ni</b><br>[ppb(ng/mL)] | <b>Ru</b><br>[ppb(ng/mL)] | <b>Pt</b><br>[ppb(ng/mL)] |
|---------------------------------------------|---------------------------|---------------------------|---------------------------|
| <b>Alkaline (KOH)</b>                       | 0.274                     | 2.015                     | not detected              |
| <b>Acidic (H<sub>2</sub>SO<sub>4</sub>)</b> | 1663.547                  | 26.822                    | not detected              |

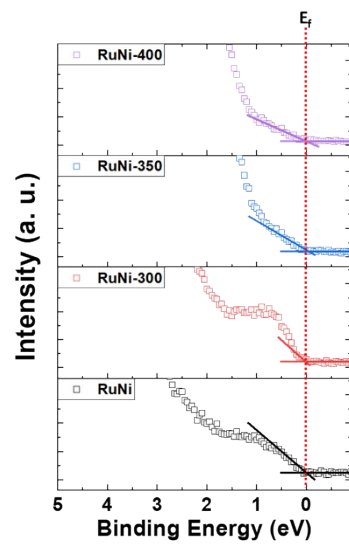

**Figure S14.** Valence band spectra of RuNi, RuNi-300, RuNi-350, and RuNi-400 aerogel samples with the  $E_f$  obtained from reference metallic gold.

**Table S6.** Comparison of the electrocatalytic HER activity of various Ru-based catalysts in both alkaline and acidic electrolytes

| Catalysts                               | Alkaline (1 M KOH)                           |                                     | Acid (0.5 M H <sub>2</sub> SO <sub>4</sub> ) |                                     | References                                   |
|-----------------------------------------|----------------------------------------------|-------------------------------------|----------------------------------------------|-------------------------------------|----------------------------------------------|
|                                         | Overpotential at 10 mA·cm <sup>-2</sup> (mV) | Tafel slope (mV·dec <sup>-1</sup> ) | Overpotential at 10 mA·cm <sup>-2</sup> (mV) | Tafel slope (mV·dec <sup>-1</sup> ) |                                              |
| <b>RuNi-350@NF</b>                      | <b>51</b><br>(89@50, 117@100)                | <b>34.0</b>                         | <b>21</b><br>(61@50, 94@100)                 | <b>30.9</b>                         | <b>This work</b>                             |
| Ru-Ru <sub>2</sub> P-4                  | 18                                           | 30.2                                | 58                                           | 34.8                                | InfoMat, 4 (2022) e12287                     |
| Ru/Ni <sub>3</sub> NNi                  | 53                                           | 32.4                                | -                                            | -                                   | Chem. Comm., 56 (2020) 2352                  |
| Ru-NG                                   | 25.9                                         | 32.6                                | ~90                                          | 55.9                                | Carbon, 183 (2021) 362                       |
| Ru@Co/N-CNTs                            | 48                                           | 33                                  | 92                                           | 30                                  | ACS Sustainable Chem. Eng., 8 (2020) 9136    |
| RuO <sub>2</sub> -300Ar                 | 17                                           | 35                                  | 16                                           | -                                   | Energy Environ. Sci., 14 (2021) 5433         |
| Ru-MnFeP/NF                             | 35                                           | 36                                  | -                                            | -                                   | Adv. Energy Mater., 10 (2020) 2000814        |
| Ru@C <sub>2</sub> N                     | 17                                           | 38                                  | 13.5                                         | 30                                  | Nat. Nanotechnol., 12 (2017) 441             |
| CoRu <sub>0.5</sub> /CQDs               | 18                                           | 38.5                                | -                                            | -                                   | Angew. Chem. Int. Ed., 60 (2021) 3290        |
| Ru@WNO-C                                | 24                                           | 39.7                                | 172                                          | 38.9                                | Nano Energy, 80 (2021) 105531                |
| Ru@Ni-MOF                               | 22                                           | 40                                  | ~60                                          | 33                                  | Angew. Chem. Int. Ed., 60 (2021) 22276       |
| RuNi/CQDs-600                           | 13                                           | 40                                  | 58                                           | 55                                  | Angew. Chem. Int. Ed., 59 (2020) 1718        |
| CNT-V-Fe-Ru                             | 38                                           | 41                                  | 64                                           | 51                                  | ACS Catal., 13 (2023) 49                     |
| RuP/H-NC-900                            | 19                                           | 42                                  | 76                                           | -                                   | Nanotechnology, 31 (2020) 295401             |
| Ru-NiCoP/NF                             | 44                                           | 45.4                                | -                                            | -                                   | Appl. Catal. B, 279 (2020) 119396            |
| Ru/NC-400                               | 39                                           | 49                                  | 55                                           | 40                                  | Adv. Funct. Mater., 31 (2021) 2100698        |
| MiSC-1                                  | 12                                           | 50                                  | 49                                           | 43                                  | Adv. Energy Mater., 11 (2021) 2100141        |
| Ru@CN                                   | 35                                           | 53                                  | 126                                          | -                                   | Energy Environ. Sci., 11 (2018) 800          |
| ECM@Ru                                  | 83                                           | 59                                  | 63                                           | 47                                  | Adv. Energy Mater., 10 (2020) 2000882        |
| Ru/Ni-V <sub>2</sub> NO/NCNFs           | 74.5                                         | 60.7                                | -                                            | -                                   | J. Electroanal. Chem., 911 (2022) 116213     |
| a-Ru@Co-DHC                             | 40                                           | 62                                  | -                                            | -                                   | Chin. J. Catal., 43 (2022) 110               |
| Ru <sub>0.10</sub> @2H-MoS <sub>2</sub> | 51                                           | 64.9                                | 168                                          | 77.5                                | Appl. Catal. B, 298 (2021) 120490            |
| RuP <sub>2</sub> @NPC                   | 52                                           | 69                                  | 38                                           | 38                                  | Angew. Chem. Int. Ed., 56 (2017) 11559       |
| CoRuO/A@HN C-2                          | 85                                           | 72.5                                | -                                            | -                                   | ACS Appl. Mater. Interfaces, 12 (2020) 51437 |
| Ru SAs-Ni <sub>2</sub> P                | 57                                           | 75                                  | 125                                          | 71                                  | Nano Energy, 80 (2021) 105467                |

|                                                     |    |       |    |      |                                   |
|-----------------------------------------------------|----|-------|----|------|-----------------------------------|
| Ru-Mo <sub>2</sub> C/CN                             | 34 | 80    | -  | -    | J. Catal., 392 (2020) 313         |
| Ru-NiFe-P                                           | 44 | 80    | -  | -    | Appl. Catal. B, 263 (2020) 118324 |
| S-RuP@NPSC                                          | 92 | 90.23 | -  | -    | Adv. Sci., 7 (2020) 2001526       |
| Ru-SA/Ti <sub>3</sub> C <sub>2</sub> T <sub>x</sub> | -  | -     | 70 | 27.7 | Small, 16 (2020) 2002888          |
| Ru-modified FeP                                     | -  | -     | 62 | 45   | J. Mater. Chem. A, 8 (2020) 22607 |
